# Supplementary material for: ATP-Induced Increase in Intracellular Calcium Levels and Subsequent Activation of mTOR as Regulators of Skeletal Muscle Hypertrophy
Source: PubMed Central journal article supplement (PMC6163678; doi:10.3390/ijms19092804), 2018-09-18
Supplement: ijms-19-02804-s001.pdf [file ijms-19-02804-s001.pdf]

# ATP-induced increase in intracellular calcium levels and subsequent activation of mTOR as regulators of skeletal muscle hypertrophy

Naoki Ito, Urs T. Ruegg and Shin'ichi Takeda

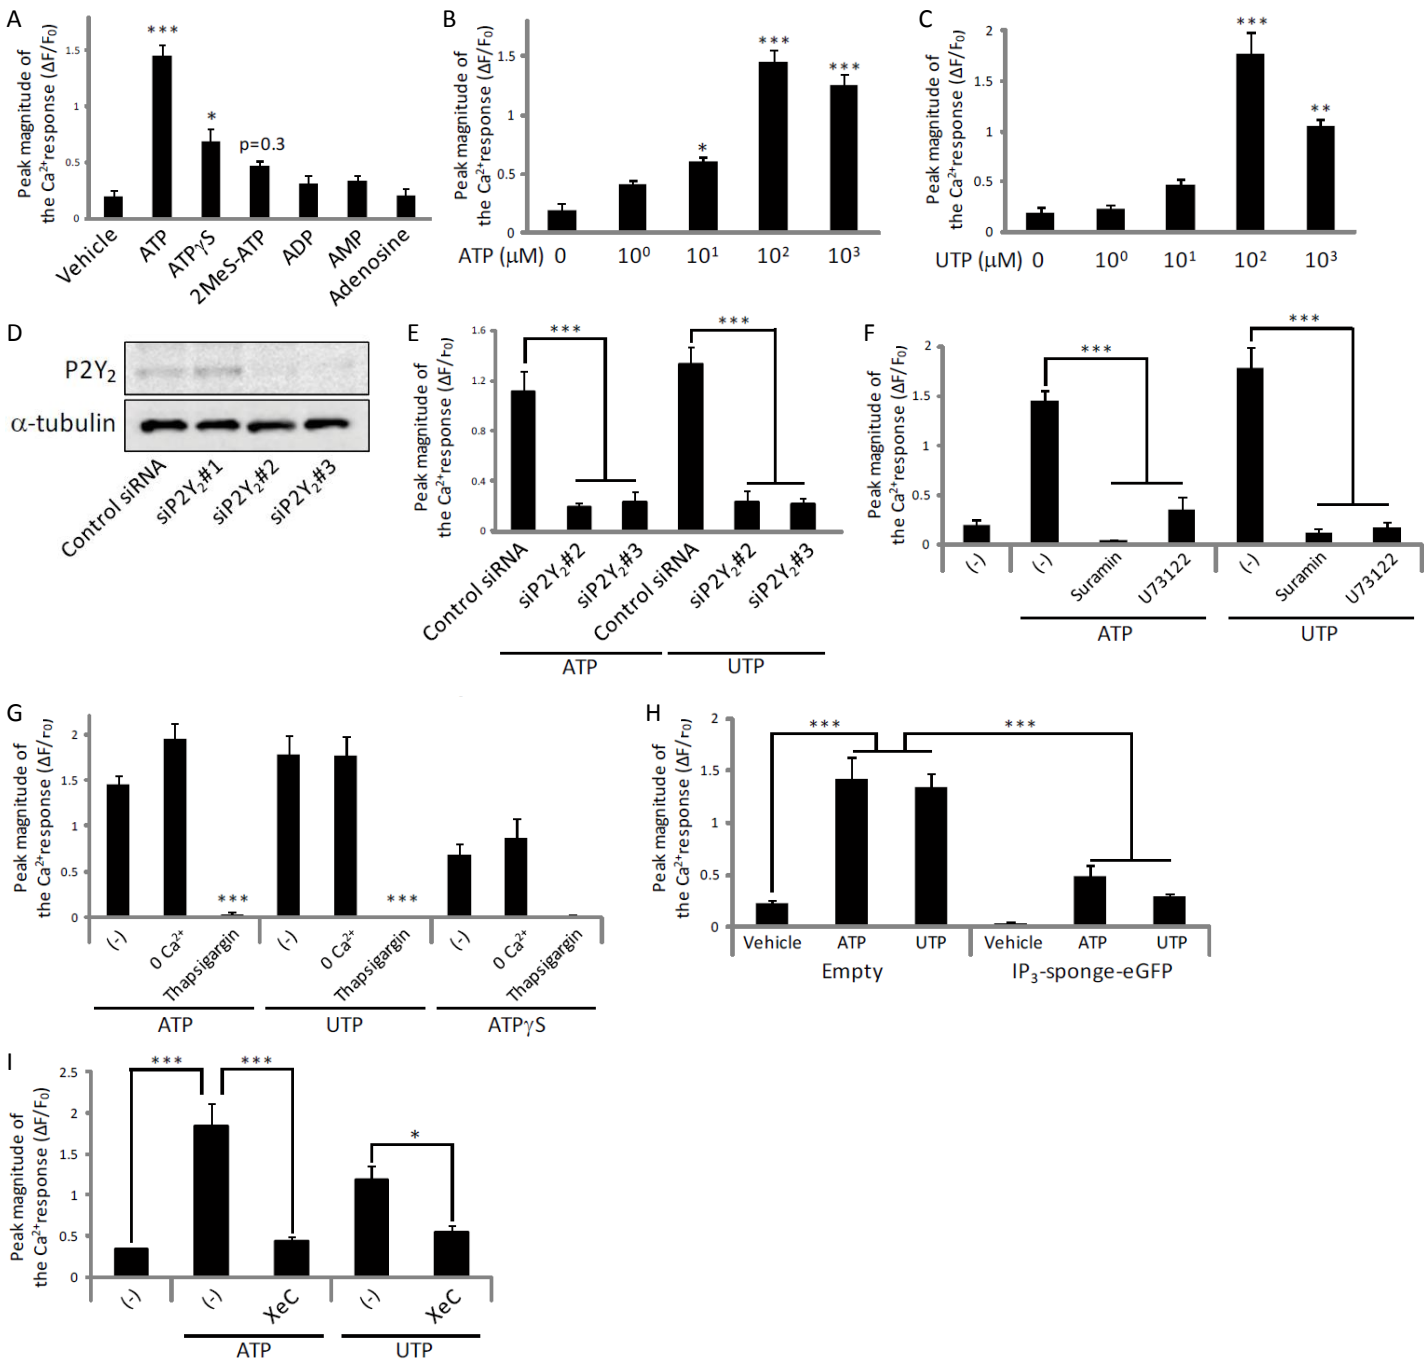

**Supplementary figure 1.** ATP induces increase in  $[\text{Ca}^{2+}]_i$  by activation of the P2Y<sub>2</sub> receptor/PLC/IP<sub>3</sub>R pathway in C2C12 myotubes related to Figure 2. (A) Quantitative analysis of the peak magnitudes of Fluo-4 intensity in ATP or ATP analog-treated C2C12 myotubes ( $n = 4$ ). (B and C) Concentration-dependent effects of ATP (B) or UTP (C) on the peak magnitude of the  $\text{Ca}^{2+}$  response ( $n = 4$ ). (D) Western blot analysis of the P2Y<sub>2</sub> receptor in siRNA-transfected C2C12 myotubes. (E) Quantitative analysis showing the effect of P2Y<sub>2</sub> gene knockdown on ATP- or UTP-induced increases in  $[\text{Ca}^{2+}]_i$  ( $n = 4$ ). (F) Quantitative analysis for the peak magnitudes of Fluo-4 intensity in suramin- or U73122-treated C2C12 myotubes with ATP or UTP (100  $\mu\text{M}$ ) ( $n = 4$ ). (G) Quantitative analysis of the peak magnitudes of Fluo-4 intensity in thapsigargin-treated C2C12 myotubes, or C2C12 myotubes in 0  $\text{Ca}^{2+}$  buffer with ATP, UTP or ATP $\gamma$ S (100  $\mu\text{M}$ ) ( $n = 4$ ). (H) Quantitative analysis showing the effect of overexpression of an IP<sub>3</sub>-sponge-eGFP on ATP- or UTP-induced increases of  $[\text{Ca}^{2+}]_i$  ( $n = 4$ ). (I) Quantitative analysis of the peak magnitudes of Fluo-4 intensity in XeC-treated C2C12 myotubes ( $n = 4$ ). \* $P < 0.05$ , \*\* $P < 0.01$ , \*\*\* $P < 0.001$  by ANOVA with Tukey-Kramer test. Error bars indicate S.E.M.
